# Supplementary material for: Striatal Lacunar Infarction in a Late Preterm Infant Born to a Mother with Active Peripartum SARS-CoV-2 Infection
Source: Case Rep Pediatr. 2023 Sep 28;2023:1611451. doi: 10.1155/2023/1611451 (PMC10555493; doi:10.1155/2023/1611451)
Supplement: Supplementary Materials — As additional materials, we offer the CARE checklist with indication of the lines where in the manuscript the respective items can be found. Additional table 1 displays prepartal coagulation studies of the mother. [file 1611451.f1.zip]

Archive with 2 entries (2 files):
- CARE-checklist-Hochmayr.pdf
- Hindawi Case Reports in Pediatrics_Hochmayr_additional Table 1_Prepartal coagulation studies of the mother.docx
